# Supplementary material for: A Facile Solid‐Phase Route to Renewable Aromatic Chemicals from Biobased Furanics
Source: PubMed Central journal article supplement — Angew Chem Int Ed Engl. 2015 Dec 18;55(4):1368–71. doi: 10.1002/anie.201509346 (PMC4737293; doi:10.1002/anie.201509346), 2015-12-18
Supplement: ANIE-55-1368-s001.pdf [file ANIE-55-1368-s001.pdf]

## Supporting Information

### **A Facile Solid-Phase Route to Renewable Aromatic Chemicals from Biobased Furanics**

*Shanmugam Thiyagarajan, Homer C. Genuino, Jan C. van der Waal, Ed de Jong,\*  
Bert M. Weckhuysen, Jacco van Haveren, Pieter C. A. Bruijnincx,\* and Daan S. van Es\**

anie\_201509346\_sm\_miscellaneous\_information.pdf

anie\_201509346\_sm\_Movie\_S1.m4v

anie\_201509346\_sm\_Movie\_S2.m4v

# Supporting Information

## 1. Experimental Section

### 1.1. Synthesis of hydrogenated Diels-Alder (DA) adducts

All the hydrogenated DA adducts were prepared according to the method reported recently, see ref [9a] of main manuscript for details.

### 1.2. Zeolite materials

The zeolite catalysts used in this study were H-Beta ( $\text{SiO}_2/\text{Al}_2\text{O}_3=25$ , CP814E), H-Y ( $\text{SiO}_2/\text{Al}_2\text{O}_3=5.2$ , CBV600), H-VUSY ( $\text{SiO}_2/\text{Al}_2\text{O}_3=11.5$ , CBV712), and H-SDUSY ( $\text{SiO}_2/\text{Al}_2\text{O}_3=32.3$ , CBV700), which were all obtained from Zeolyst International. All zeolite materials were pretreated by heating them in air overnight at 550 °C.

### 1.3. Catalyst characterization

Powder X-ray diffraction (XRD) patterns of the catalyst samples were obtained on a Bruker-AXS D2 Phaser powder X-ray diffractometer with Cu-K $\alpha$  X-ray radiation ( $\lambda=1.5418 \text{ \AA}$ ) operated at 30 kV and 10 mA. The textural properties of the samples were determined using a Micromeritics Tristar 3000 set-up. The N<sub>2</sub> adsorption and desorption experiments were conducted at 77 K after initial pre-treatment of the samples by degassing at 300 °C for 12 h under a N<sub>2</sub> flow. The surface area was determined using the Brunauer-Emmett-Teller (BET) method. The total pore volume was determined from the single point adsorption and the micropore volume was determined from the *t*-plot analysis. The pore size/diameter was derived from the adsorption isotherm by the Barrett-Joyner-Halenda (BJH) method. The acidity of the catalysts was evaluated using ammonia temperature-programmed desorption (NH<sub>3</sub>-TPD) on a Micromeritics ASAP 2920 instrument. Typically, the sample (100 mg) was placed in a quartz reactor. The zeolite was dried in a He flow by heating with a temperature ramp of 5 °C min<sup>-1</sup> to a maximum temperature of 600 °C to remove adsorbed water and chemisorbed species. Subsequently, the sample was cooled to 100 °C and NH<sub>3</sub> (10% in Ar) pulses were applied. The sample was then heated to 700 °C (5 °C min<sup>-1</sup>) to induce desorption of NH<sub>3</sub> under flowing He. The desorbed NH<sub>3</sub> was quantified using a TCD detector. The amount of ammonia desorbing at characteristic temperature above 100 °C is taken as the total concentration of acid sites. Thermal gravimetric analysis (TGA) of the catalysts was performed on a Perkin-Elmer Pyris 1 apparatus. The sample was initially heated to 50 °C for 10 min and then to 700 °C (10 °C min<sup>-1</sup>) in a 10 mL min<sup>-1</sup> flow of oxygen to burn off any carbonaceous deposits formed.

Selected trace metals (Fe, Zn, V, Ni, and Cu) in fresh, calcined zeolite Y samples were analyzed using inductively coupled plasma atomic emission spectroscopy (ICP-AES, Spectro Acros) after extraction with hydrofluoric acid.

### 1.4. Catalytic testing and regeneration

The catalytic performance of solid acid catalysts were tested using a Kugel-rohr glass oven (Buchi, B-585). In a typical reaction, 0.1 g of **2** and 0.1 g catalyst (1:1 wt%) were loaded in a round-bottom flask

and then mounted in the center of the preheated reactor. The mixture was stirred at 30 rpm under N<sub>2</sub> atmosphere. After the reaction, the solid acid catalyst was washed several times with chloroform at 45 °C and the catalyst was recovered by centrifugation. The combined organic extracts were evaporated under reduced pressure to obtain the crude products. Conversion and product yields were calculated<sup>9a</sup> from the <sup>1</sup>H NMR data (Varian 400-MR spectrometer) of the crude mixture using CDCl<sub>3</sub> (99.8 atom%, Sigma-Aldrich) and 1,4-dinitrobenzene (99%, Sigma-Aldrich) as solvent and internal standard, respectively. Catalyst regeneration of H-Y catalyst was performed by drying the spent catalyst overnight at 60 °C followed by 120 °C for 2 h, and finally at 550 °C for 6 h in air to again obtain a white-colored material.

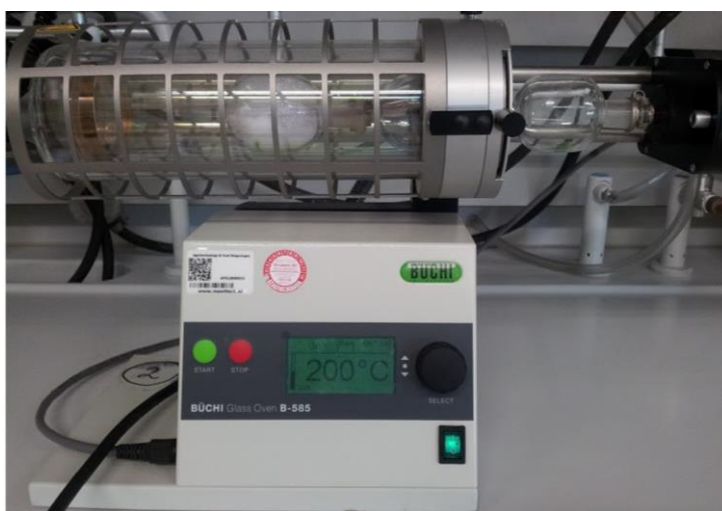

**Figure S1.** Photograph of Kugelrohr vessel filled with substrate and zeolite.

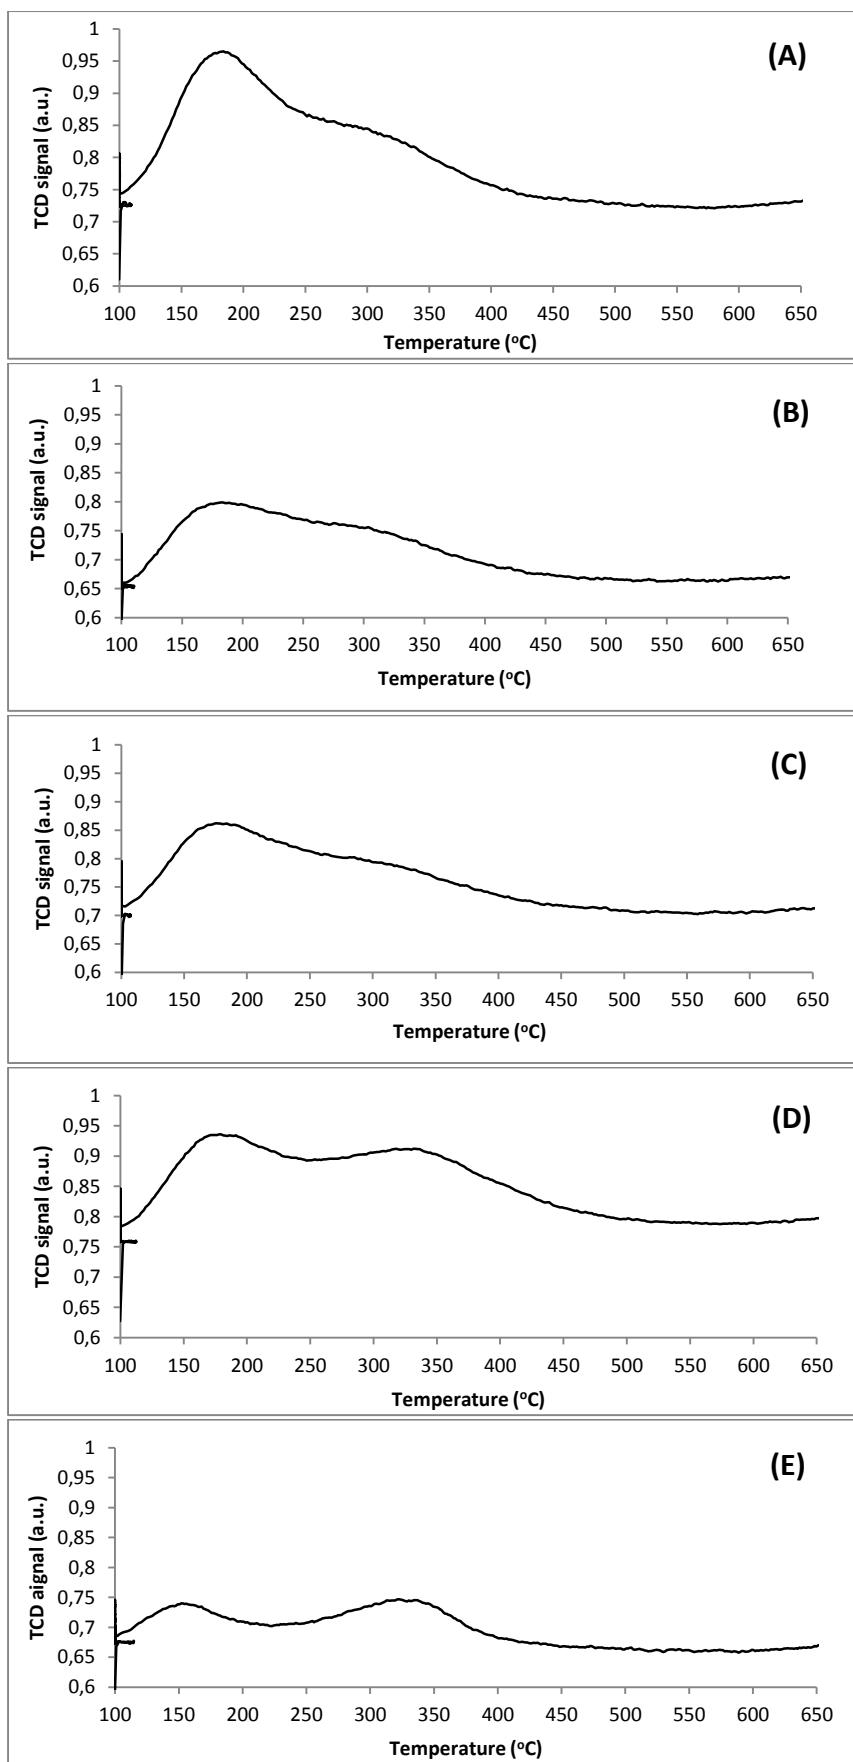

**Figure S2.** NH<sub>3</sub>-TPD profiles of the catalysts: (A) H-Beta, (B) H-Y (fresh) , (C) H-Y (after 3rd reuse), (D) H-VUSY, and (E) H-SDUSY.

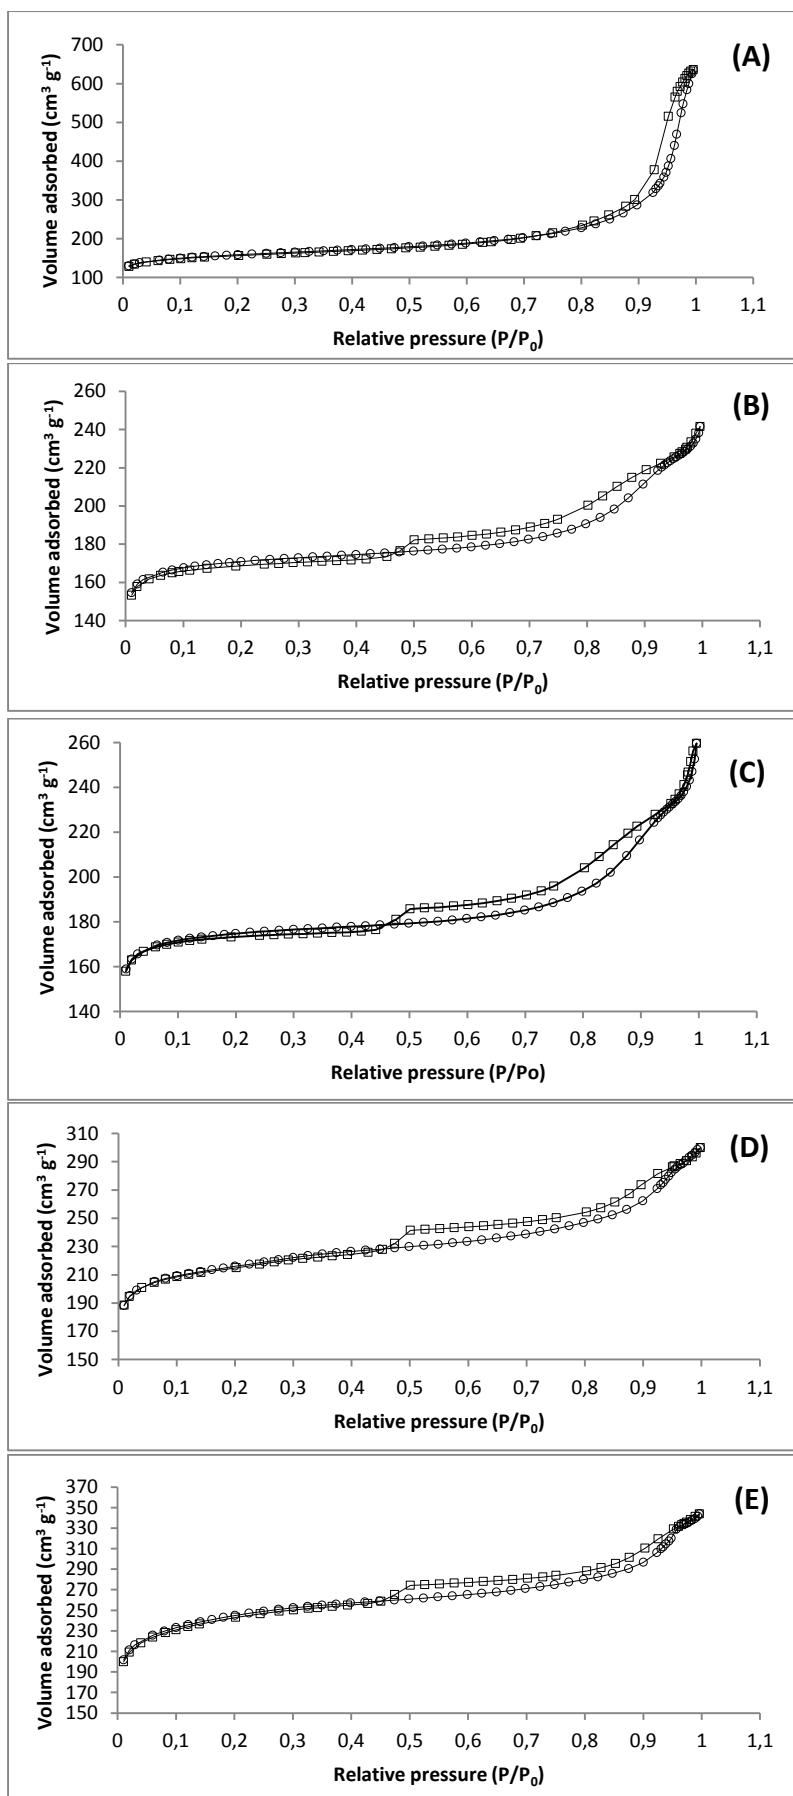

**Figure S3.** N<sub>2</sub> adsorption (circles) and desorption (squares) isotherms of the catalysts: (A) H-Beta, (B) H-Y (fresh), (C) H-Y (after 3rd reuse), (D) H-VUSY, and (E) H-SDUSY.

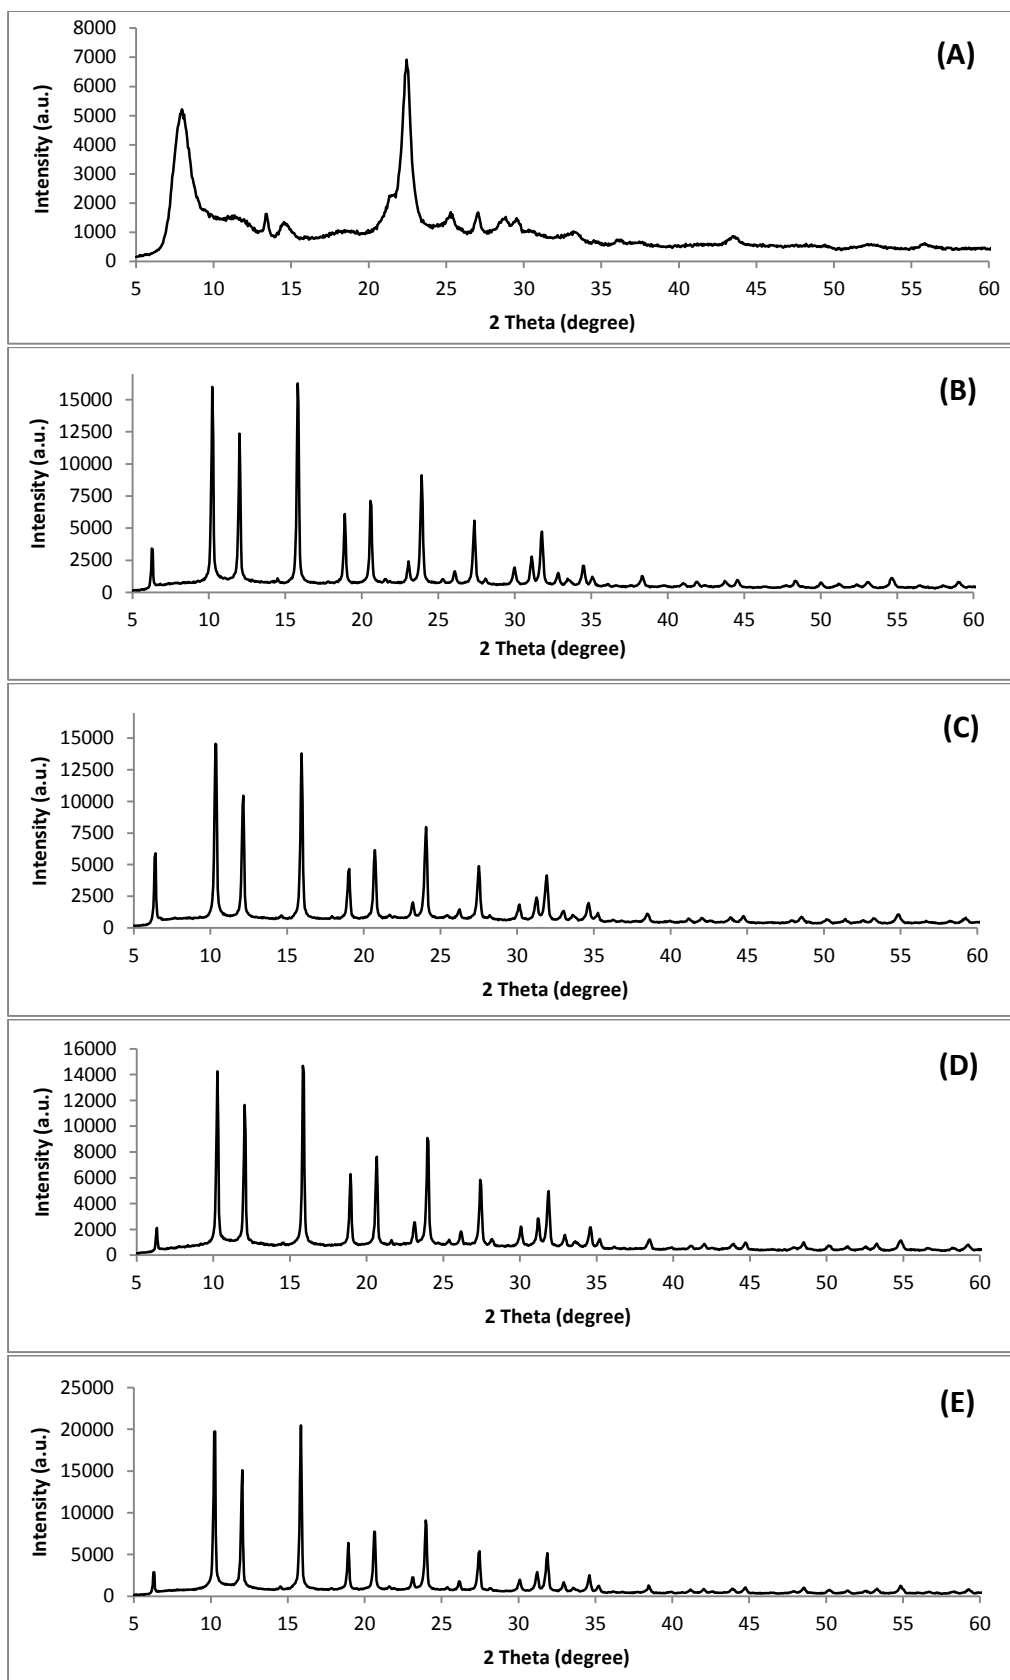

**Figure S4.** XRD patterns of the catalysts: (A) H-Beta, (B) H-Y (fresh), (C) H-Y (after 3rd reuse), (D) H-VUSY, and (E) H-SDUSY.

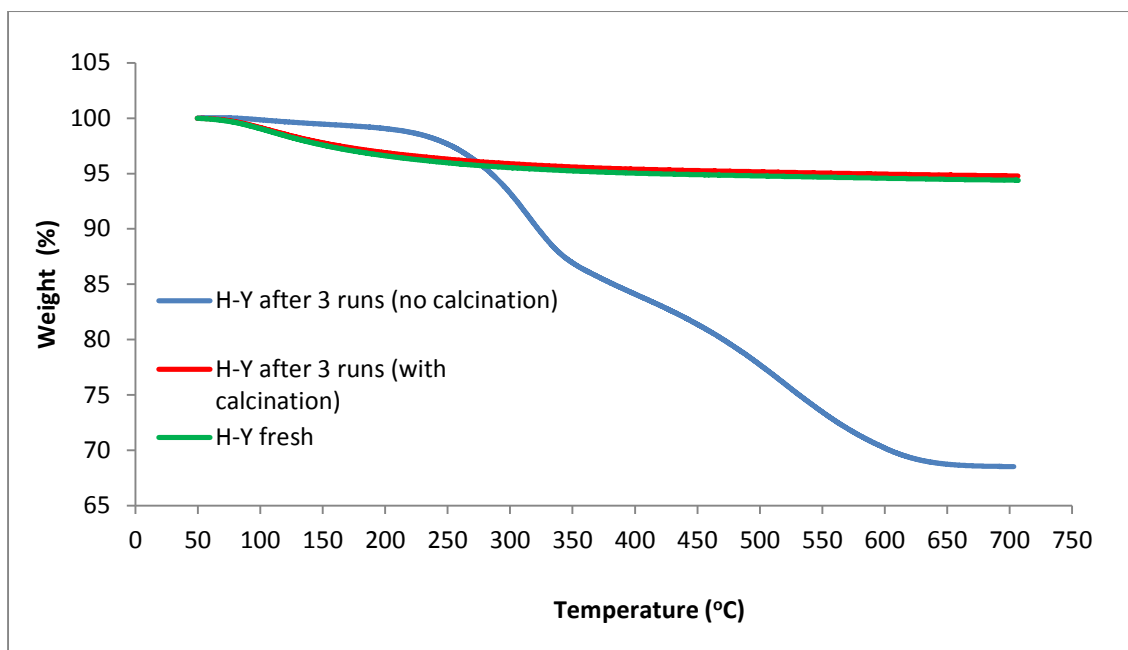

**Figure S5.** TGA profiles of fresh, spent (after 3rd reuse), and regenerated (calcined, after 3rd reuse) H-Y catalysts.

**Table S1.** Concentration ( $\text{mg kg}^{-1}$ ) of selected trace metals in commercial zeolite Y samples analyzed by ICP-AES.

| Zeolite Y | Cu     | Fe  | Ni | V      | Zn |
|-----------|--------|-----|----|--------|----|
| H-Y       | 20     | 101 | 2  | < -0.4 | 18 |
| H-VUSY    | 14     | 75  | 1  | < -0.4 | 10 |
| H-SDUSY   | < -1.3 | 90  | 2  | < -0.5 | 8  |

**Table S2.** Catalytic aromatization of hydrogenated Diels-Alder adducts in the solid-phase route using H-Y catalyst at 50% (w/w) catalyst loading.<sup>[a]</sup>

| Temp. (°C) |                            | Conversion (mol %) <sup>[b]</sup> | Molar yield [mol %] (Selectivity [mol %]) <sup>[b]</sup> |         |       |                  |                  | Mole balance <sup>[c]</sup> |
|------------|----------------------------|-----------------------------------|----------------------------------------------------------|---------|-------|------------------|------------------|-----------------------------|
|            |                            |                                   |                                                          |         |       |                  |                  |                             |
| 150        | X=CH <sub>3</sub> ;<br>Y=H | 97                                | 59 [61]                                                  | 17 [17] | 2 [2] | – <sup>[d]</sup> | – <sup>[d]</sup> | 81                          |
| 175        | X=CH <sub>3</sub> ;<br>Y=H | 98                                | 42 [43]                                                  | 32 [32] | 6 [6] | – <sup>[d]</sup> | 2 [2]            | 84                          |
| 200        | X=CH <sub>3</sub> ;<br>Y=H | 88                                | 16 [18]                                                  | 37 [43] | 8 [9] | 3 [4]            | 4 [4]            | 80                          |

[a] Conditions: 0.1 g of **2**, 0.05 g solid acid catalyst, 120 min. [b] Calculated by q-NMR using 1,4-dinitrobenzene as internal standard. [c] Mole balance determined from the total number of moles calculated from the crude mixture after the reaction by <sup>1</sup>H-NMR analysis. [d] Not observed.

**Table S3.** Aromatization of hydrogenated Diels-Alder adduct **2** and product yields as a function of time at 200 °C over H-Y at 1:1 w/w ratio.<sup>[a]</sup>

| Time (min) | Conversion (mol %) <sup>[b]</sup> | Molar yield [mol %]                                                               |                                                                                   |                                                                                   |                                                                                   |                                                                                    | Total aromatics yield (4+5+6, %) | Mole balance <sup>[c]</sup> |
|------------|-----------------------------------|-----------------------------------------------------------------------------------|-----------------------------------------------------------------------------------|-----------------------------------------------------------------------------------|-----------------------------------------------------------------------------------|------------------------------------------------------------------------------------|----------------------------------|-----------------------------|
|            |                                   | 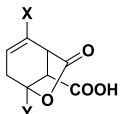 |  |  |  |  |                                  |                             |
| 5          | 100                               | 59                                                                                | 16                                                                                | 9                                                                                 | 5                                                                                 | 4                                                                                  | 30                               | 93                          |
| 15         | 100                               | 42                                                                                | 21                                                                                | 14                                                                                | 5                                                                                 | 5                                                                                  | 40                               | 87                          |
| 30         | 97                                | 10                                                                                | 46                                                                                | 13                                                                                | 5                                                                                 | 6                                                                                  | 64                               | 83                          |
| 60         | 100                               | 8                                                                                 | 47                                                                                | 14                                                                                | 8                                                                                 | 5                                                                                  | 69                               | 82                          |
| 90         | 100                               | 6                                                                                 | 51                                                                                | 13                                                                                | 7                                                                                 | 6                                                                                  | 71                               | 83                          |
| 120        | 100                               | 0                                                                                 | 61                                                                                | 12                                                                                | 7                                                                                 | 6                                                                                  | 80                               | 86                          |

[a] Conditions: 0.1 g of **2**, 0.1 g solid acid catalyst, [b] Calculated by q-NMR using 1,4-dinitrobenzene as internal standard. [c] Mole balance determined from the total number of moles calculated from the crude mixture after the reaction by <sup>1</sup>H-NMR analysis.

**Movie S1.** Solid-phase aromatization of hydrogenated Diels-Alder adduct in Kugelrohr oven in the presence of H-Y zeolite (1:1 wt%) as catalyst - in action.

**Movie S2.** H<sub>2</sub> in the aromatization of hydrogenated Diels-Alder was detected using a H<sub>2</sub> detector (LC10) - in action.
